# Supplementary material for: Impact of Three Waves of the COVID-19 Pandemic on the Rate of Elective Cataract Surgeries at a Tertiary Referral Center: A Polish Perspective
Source: MDPI journal article supplement (doi:10.3390/ijerph18168608), 2021-08-14
Supplement: s1 [file s1]

**Table S2.** Sensitivity analysis for change in numbers of elective cataract surgeries performed during the analyzed periods vs corresponding periods in 2019.

| Period                      | Number of patients | Change vs. corresponding period in 2019 (%) |
|-----------------------------|--------------------|---------------------------------------------|
| Jan 2019                    | 196                |                                             |
| Feb 2019                    | 183                |                                             |
| Mar 2019                    | 269                |                                             |
| Apr 2019                    | 357                |                                             |
| May 2019                    | 363                |                                             |
| Jun 2019                    | 346                |                                             |
| Jul 2019                    | 231                |                                             |
| Aug 2019                    | 205                |                                             |
| Sep 2019                    | 203                |                                             |
| Oct 2019                    | 240                |                                             |
| Nov 2019                    | 170                |                                             |
| Dec 2019                    | 103                |                                             |
| Jan 2020                    | 196                | 0,0%                                        |
| Feb 2020                    | 226                | 23,5%                                       |
| Mar 2020                    | 96                 | -64,3%                                      |
| Apr 2020                    | 6                  | -98,3%                                      |
| May 2020                    | 46                 | -87,3%                                      |
| Jun 2020                    | 57                 | -83,5%                                      |
| Jul 2020                    | 76                 | -67,1%                                      |
| Aug 2020                    | 108                | -47,3%                                      |
| Sep 2020                    | 143                | -29,6%                                      |
| Oct 2020                    | 136                | -43,3%                                      |
| Nov 2020                    | 88                 | -48,2%                                      |
| Dec 2020                    | 94                 | -8,7%                                       |
| Jan 2021                    | 124                | -36,7%                                      |
| Feb 2021                    | 99                 | -45,9%                                      |
| Mar 2021                    | 147                | -45,4%                                      |
| Apr 2021                    | 142                | -60,2%                                      |
| May 2021                    | 166                | -54,3%                                      |
|                             |                    |                                             |
| COVID wave 1 (Mar-May 2020) | 148                | -85,0%                                      |
| COVID wave 2 (Oct-Dec 2020) | 318                | -38,0%                                      |
| COVID wave 3 (Mar-Apr 2021) | 289                | -53,8%                                      |

Calculation of % change in each month / wave was conducted vs. corresponding period in 2019 (this approach excluded any impact of seasonality)
