# Supplementary material for: Impact of Three Waves of the COVID-19 Pandemic on the Rate of Elective Cataract Surgeries at a Tertiary Referral Center: A Polish Perspective
Source: MDPI journal article supplement (doi:10.3390/ijerph18168608), 2021-08-14
Supplement: s1 [file s1]

**Table S1.** Change in numbers of elective cataract surgeries performed during the analyzed periods vs reference value. The reference level was calculated as a mean monthly number of cataract surgeries in 2016-2019 (n=219).

| Period          | Number of patients/month* | Change vs. reference level |
|-----------------|---------------------------|----------------------------|
| 2016            | 191,8                     | -12%                       |
| 2017            | 241,4                     | 10%                        |
| 2018            | 204,1                     | -7%                        |
| 2019            | 238,8                     | 9%                         |
| Reference value | 219                       | 0%                         |
| Jan 2020        | 196                       | -11%                       |
| Feb 2020        | 226                       | 3%                         |
| Mar 2020        | 96                        | -56%                       |
| Apr 2020        | 6                         | -97%                       |
| May 2020        | 46                        | -79%                       |
| Jun 2020        | 57                        | -74%                       |
| Jul 2020        | 76                        | -65%                       |
| Aug 2020        | 108                       | -51%                       |
| Sep 2020        | 143                       | -35%                       |
| Oct 2020        | 136                       | -38%                       |
| Nov 2020        | 88                        | -60%                       |
| Dec 2020        | 94                        | -57%                       |
| Jan 2021        | 124                       | -43%                       |
| Feb 2021        | 99                        | -55%                       |
| Mar 2021        | 147                       | -33%                       |
| Apr 2021        | 142                       | -35%                       |
| May 2021        | 166                       | -24%                       |

\*mean for each year of period 2016-2019
